# Supplementary material for: Near-Infrared Spectroscopy and Chemometrics for the Routine Detection of Bilberry Extract Adulteration and Quantitative Determination of the Anthocyanins
Source: Hindawi journal article supplement (doi:10.1155/2018/4751247), 2018-07-16
Supplement: f1 [file 4751247.f1.docx]

**Supplementary 1 (S1)**

Chromatogram integrated at 520 nm of Reference (Sref) and not comply bilberry extracts (Sa-Sd).1, D-gal; 2, D-glc; 3, Cy-gal; 4, D-ara; 5, Cy-glc; 6, Pt-gal; 7, Cy-ara; 8, Pt-glc; 9, Pe-gal; 10, Pt-ara; 11, Pe-glc; 12, Mv-gal; 13, Pe-ara; 14, Mv-glc; 15, Mv-ara; a, Delphinidin (D); b, Cyanidin Cy); c, Petunidin (Pt); d, Peonidin (Pe); e, Malvidin (Mv); A, Cy-rutinoside; B, Cy-xyloside.


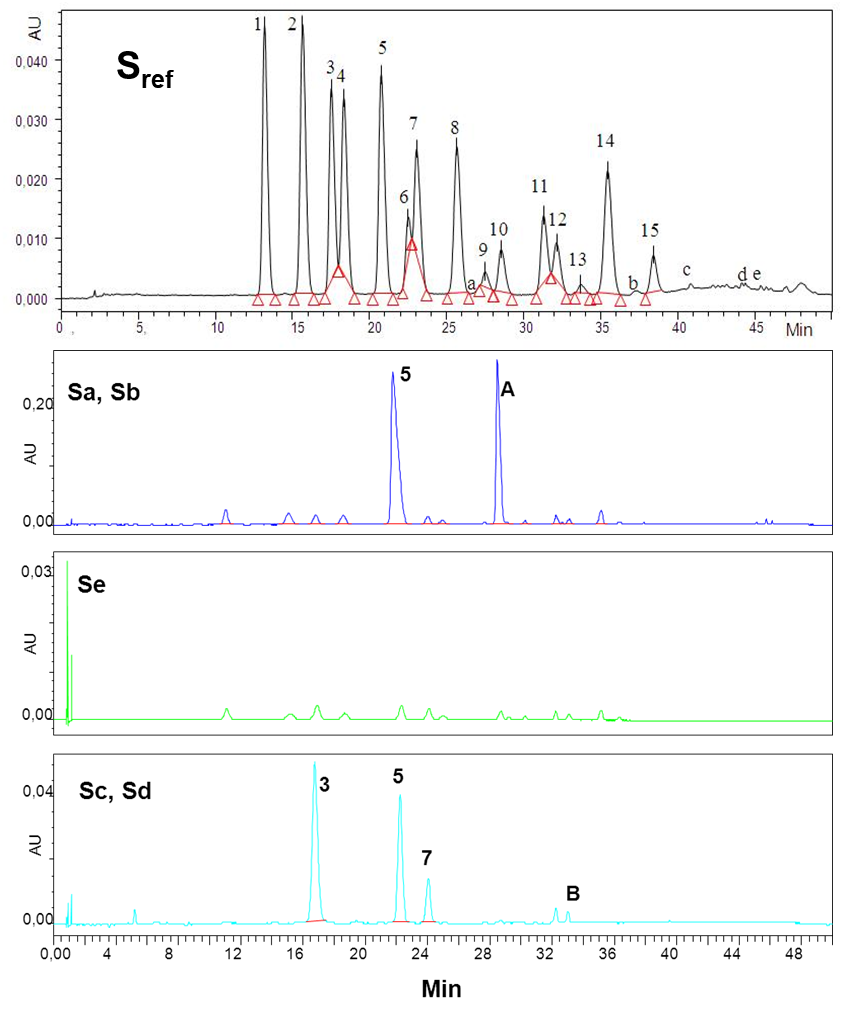


**Supplementary 2 (S2)**

Evaluation of the best Rank by plotting the root mean square error of calibration (RMSEE) and prediction (RMSEP) values against the correspondent’s rank.

**Supplementary 3 (S3)**

Residuum distribution (True ACN % - Predicted ACN %) against true ACN %.

Normal distribution of the residuum (W=0.9689).

**Supplementary 4 (S4)**

The plot of the spectral residual against Mahalanobis distance (MD) indicates that the not comply extracts (red dot) lieall over MD value (0.91).
